# Supplementary material for: Using electronic patient records to assess the effect of a complex antenatal intervention in a cluster randomised controlled trial—data management experience from the DESiGN Trial team
Source: Trials. 2021 Mar 8;22:195. doi: 10.1186/s13063-021-05141-8 (PMC7941939; doi:10.1186/s13063-021-05141-8)
Supplement: Supplementary file 2 — Additional file 2. Data dictionary. Detailed dictionary used for naming variables, describing variables and formatting variable names and values so that they were harmonised across a dataset from 13 sources. [file 13063_2021_5141_MOESM2_ESM.xlsx]

## Sheet: Maternal variables by hospital
MATERNAL DATA
Variable name	Title	Variable Explanation	Variable option	Example site - raw data
Standard variables
mc_studyid	Study ID	ID of the study participant
mc_pregid	Pregnancy ID	ID of pregnancy/ies within study period	Numerical
mc_babyid	Baby ID	ID of baby, if twins - 1 and 2	Numerical
mc_neonatdata	Neonatal data	Pregnancy information in neonatal dataset	0=no 1=yes
mc_ussdata	USS data	Pregnancy information in ultrasound dataset	0=no 1=yes
mc_activdata	Activity data	Pregnancy information in activity dataset	0=no 1=yes
mc_hospid	Hospital ID	ID of hospital site where care was received (not patient ID)	1 = GSTT 2 = Homerton 3 = Kingston 4 = North Middlesex 5 = Royal Surrey 6 = St George's 7 = Croydon 8 = Chesterfield 9 = Imperial 10 = UCLH 11 = West Middlesex 12 = Hillingdon 13 = Northwick Park	1
mc_interventiongrp	Control/implementation		0 = control 1 = implementation	0
mc_impl	If implementation site - ?intervention implemented/not		0 = not implemented 1 = implemented	.
mc_timeperiod	Birth within baseline, transitional or comparison period		0 = baseline 1 = trial 2 = comparison	Baseline = 3/11/15 - 2/11/16 Trial = 3/11/16 - 31/8/18 Comparison = 1/9/18 - 28/2/19
mc_agedel	Maternal age at delivery	Calculated on site from DOB and date of delivery	Numerical
mc_ageconc	Maternal age at conception	= Date of delivery - gestational age at delivery (total days) + 14	Numerical
mr_agebk	Age at booking - provided by the site		Numerical
mc_age12w	Age at booking - calculated	Calculated from age at conception plus 10 weeks	Numerical
mc_imd	IMD	Calculated on site from postcode	Numerical
mc_lsoa	LSOA	Calculated on site from postcode
mc_msoa	MSOA	Calculated on site from postcode
	Maternal demographics
mr_ht	Height	Maternal height at booking	Numerical	mheight numerical
mr_wt	Weight	Maternal weight at booking	Numerical	mweight numerical
mr_bmi	BMI	BMI as provided by site	Numerical	bmiatbooking numerical
ur_ht	Height	Maternal height (m) at booking	Numerical	US_mat_height Numerical (cm)
ur_wt	Weight	Maternal weight (kg) at booking	Numerical	US_mat_weight Numerical (kg)
ur_bmi	BMI	BMI as provided by site	Numerical	US_mat_bmi Numerical (kg/m2)
mh_ht	Height	Maternal height (m) at booking	Numerical
mh_wt	Weight	Maternal weight (kg) at booking	Numerical
mc_bmi	BMI calculated	BMI created from mh_ht & mh_wt (kg/m^2)	Numerical
mc_bmicat	BMI category	Categorised from mc_bmi	1 = <18.5 2 = 18.5-24.99 3 = 25.0-29.99 4 = 30.0-34.99 5 = 35.0-39.99 6 = 40.0+
mr_ed	Education	Maternal level of education	NOT AVAILABLE
mr_ethn	Ethnicity	Maternal ethnic background	As provided	motherethnicity Any other ethnic group Asian-Other Bangladeshi Black African Black Caribbean Black-Other British Chinese Declined to answer Indian Irish Mixed-Other Not stated Pakistani White and Asian White and Black African White and Black Caribbean White-Other missing data
ur_ethn	Ethnicity	Maternal ethnic background	As provided	Ethnicity black (African, Caribbean, African-American) East Asian (Chinese, Korean, Japanese) South Asian (Indian, Pakistani, Bangladeshi) white (European, Middle Eastern, North African, Hispanic) Other Ethnic_group African Afro-Caribbean Asian black Brasil Caucasian Oriental Other Polish
mr_country	Country of birth	Maternity country of birth	As provided	countryofbirth countries listed (A-Z)
mh_country	Country of birth	Maternity country of birth	Cleans typos from provided values
mc_countrycust	Countrty of birth as per GROW charts	Maternity country of birth as per GROW charts	1=Afghanistan 2=Albania 3=Angola 4=Antilles 5=Argentina 6=Australia - Aboriginal 7=Australia - European 8=Australasia 9=Bangladesh 10=Belgium 11=Bhutan 12=Bosnia and Herzegovina 13=Brazil 14=Bulgaria 15=Burundi 16=Cameroon 17=Canada 18=Cape Verde 19=Caribbean 20=Central Asia 21=Chile 22=China 23=Colombia 24=Congo 25=Cook Islands 26=Czech Republic 27=Denmark 28=East Europe 29=Ecuador 30=Egypt 31=E…
mc_ethngrp	Ethnicity - small groups		0 = white 1 = black 2 = asian 3 = mixed 4=other
mc_ethncustgrp	Ethnicity - customised groups	Where country of origin is available and ethnicity matches this country of origin, use country of origin to guide choice of ethnic customised group. If country of origin differs from usual ethnicity, use ethnicity to guide choice of customisation.	0 = United Kingdom 1 = East Europe 2 = West Europe 3 = South Europe 4 = North Europe 5 =Middle East 6 =Central Asia 7=East Asia 8 =Far East Asia 9 =South Asia 10 =South East Asia 11 =North Africa 12 =Sub-Saharan Africa 13 =Caribbean 14 =North America 15 =South America 16 =Australasia 17 =Pacific Islands 18=Mixed African-European 19=Mixed Asian-European 20=Mixed Caribbean-European 21=Other
mr_par	Parity	Number of previous deliveries >24weeks	Numerical	Parabeforedelivery Numerical (0-9)
mr_parstatus	Parity	Primiparous or multiparous	As provided
ur_par	Parity	Number of previous deliveries >24weeks	Numerical
mc_multip	Nulliparous / multiparous		0 = nulliparous (never had a baby) 1 = multiparous
mr_smke	Smoking in early pregnancy		As provided	smokeratbooking No Unknown Yes not recorded
mr_smkl	Smoking in late pregnancy		As provided
mr_smkany	Any smoking in pregnancy		As provided
mh_smkany	Any smoking in pregnancy		0 = non-smoker 1 = any smoking in pregnancy
	Maternal risk factors
mr_medhx	Maternal medical history	Any previous medical history	As provided
mr_htn	Pre-existing hypertension	Maternal existing hypertension	As provided	hypertension Hypertension (not in pregnancy) Hypertension (not in pregnancy),Other.. NULL Other hypertensive disorder:
mh_htn	Pre-existing hypertension	Maternal existing hypertension	0 = no known history of hypertension 1 = pre-existing hypertension
ur_htn	Pre-existing hypertension	Maternal existing hypertension	As provided
uh_htn	Pre-existing hypertension	Maternal existing hypertension	0 = no known history of hypertension 1 = pre-existing hypertension
mr_dm	Pre-existing diabetes	Maternal existing Type 1 or Type 2 diabetes mellitus	As provided	diabetes NULL diabetes_gestatational diabetes_type1 diabetes_type1,diabetes_gestational diabetes_type2 diabetes_type2,diabetes_gestational n u
mh_dm	Pre-existing diabetes	Maternal existing Type 1 or Type 2 diabetes mellitus	0 = no known pre-existing diabetes 1 = pre-existing diabetes
ur_dm	Pre-existing diabetes	Maternal existing Type 1 or Type 2 diabetes mellitus	As provided
uh_dm	Pre-existing diabetes	Maternal existing Type 1 or Type 2 diabetes mellitus	0 = no known pre-existing diabetes 1 = pre-existing diabetes
mr_sle	Pre-existing SLE	Maternal existing systemic lupus erythematous	As provided	autoimmune Multiple Sclerosis (MS) NULL Other autoimmune disorder:Antiphospho… Other autoimmune disorder: Rheumatoid arthritis Sjogren's Syndrome n sle
mh_sle	Pre-existing SLE	Maternal existing systemic lupus erythematous	0 = no known pre-existing SLE 1 = pre-existing SLE
ur_sle	Pre-existing SLE	Maternal existing systemic lupus erythematous	As provided
uh_sle	Pre-existing SLE	Maternal existing systemic lupus erythematous	0 = no known pre-existing SLE 1 = pre-existing SLE
mr_apls	Pre-existing APLS	Maternal existing antiphospholipid syndrome	As provided	autoimmune Multiple Sclerosis (MS) NULL Other autoimmune disorder:Antiphospho… Other autoimmune disorder: Rheumatoid arthritis Sjogren's Syndrome n sle
mh_apls	Pre-existing APLS	Maternal existing antiphospholipid syndrome	0 = no known existing APLS 1 = pre-existing APLS
ur_apls	Pre-existing APLS	Maternal existing antiphospholipid syndrome	As provided
uh_apls	Pre-existing APLS	Maternal existing antiphospholipid syndrome	0 = no known existing APLS 1 = pre-existing APLS
mr_fib	Fibroids	Maternal existing fibroid uterus	As provided	medicaldiagnosis_gynaecological cone biopsy fibroids other uterine surgery Other gynaecological problem Uterine anomalies
ur_fib	Fibroids	Maternal existing fibroid uterus	As provided
mh_fib	Fibroids	Maternal existing fibroid uterus	0 = no known fibroids ≥5cm 1 = known fibroids ≥5cm
mr_obhx	Maternal obstetric history	Any previous obstetric history	As provided
mr_prevgdm	Previous GDM	History of gestational diabetes in previous pregnancy	As provided
mh_prevgdm	Previous GDM	History of gestational diabetes in previous pregnancy	0 = no known Hx previous GDM 1 = previous GDM
mr_lga	Previous LGA	History of large for gestational age in previous pregnancy (>4kg)	NOT AVAILABLE
mr_sga	Previous SGA	History of small for gestational age in previous pregnancy (<10th centile)	NOT AVAILABLE
	Maternal pregnancy outcomes
mr_pregcompl	Current pregnancy complications		As provided	currentpregnancyriskfactor APH Bacterial Vaginosis Cervical incompetence Concern(s) for Fetal Well-being Eclampsia FGR Fetal Growth Issues Gestational diabetes Group B Streptococcus Hepatitis Herpes Zoster Hypertension with proteinuria Hypertension without proteinuria Idiopathic thrombocytopenia Major Placenta Praevia Mental Health Problems Oligohydramnios Other Bacterial Infection Other Blood Di…
mr_pet	Presence of pre-eclampsia	Diagnosis of pre-eclampsia / PET (BP + proteinuria)	As provided	currentpregnancyriskfactor APH Bacterial Vaginosis Cervical incompetence Concern(s) for Fetal Well-being Eclampsia FGR Fetal Growth Issues Gestational diabetes Group B Streptococcus Hepatitis Herpes Zoster Hypertension with proteinuria Hypertension without proteinuria Idiopathic thrombocytopenia Major Placenta Praevia Mental Health Problems Oligohydramnios Other Bacterial Infection Other Blood Di…
mh_pet	Presence of pre-eclampsia	Diagnosis of pre-eclampsia / PET (BP + proteinuria)	0 = no known PET diagnosis 1 = PET diagnosed in this pregnancy
ur_pet	Presence of pre-eclampsia	Diagnosis of pre-eclampsia / PET (BP + proteinuria)	As provided
uh_pet	Presence of pre-eclampsia	Diagnosis of pre-eclampsia / PET (BP + proteinuria)	0 = no known PET diagnosis 1 = PET diagnosed in this pregnancy
mr_eclamp	Presence of eclampsia	Diagnosis of eclampsia (PET with eclamptic seizure)	As provided	currentpregnancyriskfactor APH Bacterial Vaginosis Cervical incompetence Concern(s) for Fetal Well-being Eclampsia FGR Fetal Growth Issues Gestational diabetes Group B Streptococcus Hepatitis Herpes Zoster Hypertension with proteinuria Hypertension without proteinuria Idiopathic thrombocytopenia Major Placenta Praevia Mental Health Problems Oligohydramnios Other Bacterial Infection Other Blood Di…
mh_eclamp	Presence of eclampsia	Diagnosis of eclampsia (PET with eclamptic seizure)	0 = no known eclampsia 1 = known eclampsia in this pregnancy
mr_pih	Gestational hypertension	Diagnosis of HTN in pregnancy	As provided	currentpregnancyriskfactor APH Bacterial Vaginosis Cervical incompetence Concern(s) for Fetal Well-being Eclampsia FGR Fetal Growth Issues Gestational diabetes Group B Streptococcus Hepatitis Herpes Zoster Hypertension with proteinuria Hypertension without proteinuria Idiopathic thrombocytopenia Major Placenta Praevia Mental Health Problems Oligohydramnios Other Bacterial Infection Other Blood Di…
mh_pih	Gestational hypertension	Diagnosis of HTN in pregnancy	0 = no known PIH 1 = known PIH in this pregnancy
ur_pih	Gestational hypertension	Diagnosis of HTN in pregnancy	As provided
uh_pih	Gestational hypertension	Diagnosis of HTN in pregnancy	0 = no known PIH 1 = known PIH in this pregnancy
mr_gdm	Gestational diabetes	Diagnosis of GDM with positive OGTT	As provided	currentpregnancyriskfactor APH Bacterial Vaginosis Cervical incompetence Concern(s) for Fetal Well-being Eclampsia FGR Fetal Growth Issues Gestational diabetes Group B Streptococcus Hepatitis Herpes Zoster Hypertension with proteinuria Hypertension without proteinuria Idiopathic thrombocytopenia Major Placenta Praevia Mental Health Problems Oligohydramnios Other Bacterial Infection Other Blood Di…
mh_gdm	Gestational diabetes	Diagnosis of GDM with positive OGTT	0 = no known GDM in this pregnancy 1 = known GDM in this pregnancy
ur_gdm	Gestational diabetes	Diagnosis of GDM with positive OGTT	As provided
uh_gdm	Gestational diabetes	Diagnosis of GDM with positive OGTT	0 = no known GDM in this pregnancy 1 = known GDM in this pregnancy
mr_inf	Maternal infection	Diagnosis of infection by screening method	As provided	currentpregnancyriskfactor APH Bacterial Vaginosis Cervical incompetence Concern(s) for Fetal Well-being Eclampsia FGR Fetal Growth Issues Gestational diabetes Group B Streptococcus Hepatitis Herpes Zoster Hypertension with proteinuria Hypertension without proteinuria Idiopathic thrombocytopenia Major Placenta Praevia Mental Health Problems Oligohydramnios Other Bacterial Infection Other Blood Di…
mh_inf	Maternal infection	Diagnosis of infection by screening method	0 = no known maternal infection 1 = known maternal infection in this pregnancy
mr_anom	Fetal congenital anomaly	Fetal anomaly diagnosed in pregnancy	As provided	abnormalitiessuspecteddisplay Bowel atresia Cardiac problems Cleft lip Diaphragmatic hernia Exomphalous Gastro intestinal problem Hydrocele Hypospadia Microcephaly NULL None Other: Renal problem Sickle cell disease Spina bifida Talipes Trisomy 18 Trisomy 21 Uncertain Undescended testicles
ur_anom	Fetal congenital anomaly	Fetal anomaly diagnosed in pregnancy	As provided
mh_anom	Fetal congenital anomaly	Fetal anomaly diagnosed in pregnancy	0 = not diagnosed with fetal congenital anomaly antenatally 1 = antenatally diagnosed fetal congenital anomaly
mh_iugr	IUGR detected in this pregnancy		0 = no diagnosis of IUGR 1 = baby diagnosed as IUGR
mh_abruption	Placental abruption in this pregnancy		0 = no placental abruption 1 = placental abruption
	Maternal birth outcomes
mr_deldt	Date and time of delivery	As supplied	dd/mm/yyyy hh:mm
mh_delday	Date of delivery	Delivery date (dd/mm/yyyy)	dd
mh_delmonth			mm
mh_delyear			yyyy
mh_delhour	Time of delivery - hour		hh
mh_delmin	Time of delivery - minutes		mm
mr_labonset	Onset of labour	If labour was spontaneous, induced or elective caesarean	As provided	onsetoflabour Caesarean Section Before Labour (incl.. Induced - Successful Spontaneous missing data
mr_iol	Induction of labour	If induction of labour required	As provided	onsetoflabour Caesarean Section Before Labour (incl.. Induced - Successful Spontaneous missing data
mh_onsetlab	Induction of labour	If induction of labour required	0 = spontaneous onset labour 1 = induced labour 2 = pre-labour CS
mr_labprob	Maternal problems in the first stage of labour	Free text	As provided	maternalproblemsfirststage 0 NULL dystocia haemorrhage hypertension maternaldistress oliguria other preeclampsia pyrexia unknown urineinfection
mr_mod	Mode of delivery	Raw free text - vaginal birth, instrumental (forcep, ventouse), caesarean section	As provided	modeofdeliverydisplay Breech delivery, spontaneous, assiste.. Breech extraction, NOS Cephalic vaginal delivery, with abnor.. Elecitve (planned) caesarean section Emergency and unspecified caesarean s.. Low forceps, no rotation, forceps NOS Mid cavity forceps - no rotation NULL Normal, spontaneous vertex vaginal de.. Other and unspecified method of deliv.. Rotational forceps (incl Kiellands) Vento…
mh_mod	Mode of delivery		0 = caesarean section 1 = normal vaginal birth 2 = instrumental birth 3 = breech vaginal birth
mr_cs	Caesarean section	If caesarean section performed	As provided
mh_instrtype	Type of instrumental vaginal birth		0 = no 1 = forceps 2 = ventouse 3=both
mh_cstype	Emergency caesarean section		0 = Emergency CS 1 = Elective CS
mr_fetpres	Fetal presentation	Presentation of the fetus at delivery - cephalic, breech, transverse	As provided
mh_fetalpres	Fetal presentation		0 = cephalic 1 = breech 2 = transverse 3 = oblique 4 = other
mr_epis	Episiotomy	If episiotomy was performed during delivery	As provided	episiotomyperformed No Not known Yes missing data
mr_per	Perineum	If perineal tear sustained during delivery		perinealtrauma 1st Degree Tear - injury to perineal .. 2nd Degree Tear - Perineal muscles bu.. 3rd Degree Tear (3A) - Less than 50% o.. 3rd Degree Tear (3B) - More than 50% o.. 3rd Degree Tear (3C) - Both EAS and IA.. 4th Degree Tear (The anal spincter .. Clitoral No Not Known missing data
mh_epis	Episiotomy		0 = no 1 = yes
mh_tear	Perineal tear in labour		0 = none 1 = 1st degree 2 = 2nd degree 3 = 3rd degree 4 = 4th degree 5 = other
mh_34	3/4th degree tear	If 3rd or 4th degree tear sustained during delivery	0 = no 1 = yes
mr_ebl	Estimated blood loss	The quantity (mL) of blood loss during delivery	Numerical	bloodloss numerical
mc_pph	Postpartum haemorrhage - category	Category of PPH (mL)	0 = <500mL 1 = 500-999mL 2 = 1000-1499mL 3 = >1500mL
mr_feed	Method of neonatal feeding	Type of feeding, as supplied	As provided	Feedingmethodatdischarge
mh_bf	Breastfeeding	If breastfeeding was method of feeding	0 = no 1 = yes
mr_epid	Epidural	If epidural was used during labour	As provided
mr_anal	Type of analgesia	Any analgesia used during labour - this includes nitrous oxide, pethidine, morphine	As provided	analgesiaandanaesthesiasummar aromatherapy birthingpool codeine cse diamorphine entonox epidural ga gasAndAir hypnosis massage missingdata morphine paracetamol pca pudendal showerBath spinal tens
mh_anaesthetic	Type of anaesthetic for Caesarean birth		0 =none 1=spinal 2= combined spinal epidural 3 = epidural 4 = general anaesthesia
mh_epid	Epidural status	If epidural used	0 = no 1 = yes
	Birth details
mr_num	Number of babies	Description of how many babies were delivered	Numerical	numbabies 1-3
mh_singmult	Singleton or multiple pregnancy	Singleton = single, multiple = 2 or more babies	0 = Singleton 1 = multiple
mr_bord	Birth order	Birth order for multiple pregnancies	As provided
mr_ga	Gestational age at birth - weeks and days	The gestational age in weeks and days at delivery (eg. 38+5)	As provided
mr_gawk	Gestational age at birth - weeks	Gestational age in weeks at delivery (ie. completed, whole number eg. 38)	As provided	gestationatdeliveryweeks Numerical (12-47)
mr_gaday	Gestational age at birth - days	Gestational age in days at delivery (ie. completed, whole number eg. 5)	As provided	gestationatdeliverydays 0-6
mh_gatotal	Gestational age at birth - total days	Gestational age - total in days (eg. 280 = 38*7+5)	Integer
mh_gaweeks	Gestational age in weeks and decimal weeks	=mr_gawk + (mr_gaday/7) OR =mh_gatotal/7	Numerical
mc_gaweeks	Gestational age in weeks and decimal weeks	Calculated from date of delivery and EDD (USS database)	Numerical
mc_preterm	Preterm	If delivery preterm occurred at <37+0?	0 = no 1 = yes
mr_nsex	Neonatal sex	The sex of the neonate	As provided	babygender Female Male Null
nr_nsex	Neonatal sex	The sex of the neonate	As provided
mh_nsex	Neonatal sex	The sex of neonate in categories	0 = female 1 = male 2 = indeterminate
mr_bwt	Birthweight	Neonatal birthweight - as supplied	As provided	birthweightgrams Numerical (g)
mh_bwt	Birthweight (g)	Neonatal birthweight (g)	Numerical
mc_popcent	Population birthweight centile		Numerical
mc_custcent	Customised birthweight centile		Numerical
mc_custsga	SGA by customised centile		0 = not SGA 1 = SGA
mc_custlga	LGA by customised centile		0 = not LGA 1 = LGA
mc_popsga	SGA by population centile		0 = not SGA 1 = SGA
mc_poplga	LGA by population centile		0 = not LGA 1 = LGA
mc_popcustsga	SGA by population and customised centile		0 = not SGA 1 = SGA
mc_popcustlga	LGA by population and customised centile		0 = not LGA 1 = LGA
mr_birtho	Birth outcome	Birth outcome - as supplied	As provided	finalbirthoutcome Antepartum stillbirth Intrapartum stillbirth Livebirth Neonatal Death Non Registerable Birth
nr_outcome	Final birth outcome	What was the final birth outcome	As provided
mh_birtho	Birth outcome - liveborn, stillborn, miscarriage	Birth outcome	0 = liveborn 1 = stillborn 2 = miscarriage
mc_outcome	Final birth outcome		0 = liveborn 1 = antenatal stillbirth 2 = intrapartum stillbirth 3 = early neonatal death 4 = late neonatal death 5 = death before discharge (after 28days of birth)
mr_headcir	Head circumference	Neonatal head circumference - as supplied	As provided	headcircumference Numerical (cm)
nr_headcir	Head circumference	Neonatal head circumference (cm)	As provided
mh_headcir	Head circumference	Use mr_headcir unless missing (then use nr_headcir)	Numerical
mr_apgar5	5 min Apgar score	What Apgar score was at 5min	As provided
nr_apgar5	5 min Apgar score	What Apgar score was at 5min	As provided
mh_apgar5	5 min Apgar score		Integer
mr_cordartph	Arterial cord pH	Arterial cord pH at delivery	As provided
nr_cordartph	Arterial cord pH	Arterial cord pH at delivery	As provided
mh_cordartph	Arterial cord pH		Integer
mr_cordartbe	Arterial cord BE	Arterial cord pH at delivery	As provided
nr_cordartbe	Arterial cord BE	Arterial cord pH at delivery	As provided
mh_cordartbe	Arterial cord BE		Integer
nr_respsupp	Respiratory support in delivery room	Refers to if resuscitaire was needed in delivery room	As provided
mr_respsupp	Respiratory support in delivery room	Refers to if resuscitaire was needed in delivery room	As provided
mh_respsupp	Respiratory support in delivery room	Refers to if resuscitaire was needed in delivery room. Answer yes if any evidence of resuscitation in nr_respsupp or mr_respsupp	0 = no 1 = yes

## Sheet: Neonatal variables
	NEONATAL OUTCOME DATA
Mark with an "X" if required	Variable name	Title	Variable Explanation	Variable option	Example site - raw data
	Standard variables
	mc_studyid	Study ID	ID of the study participant
	mc_pregid	Pregnancy ID	ID of pregnancy/ies within study period	Numerical
	mc_babyid	Baby ID	ID of baby, if twins - 1 and 2	Numerical
		Neonatal outcomes
	nr_cool	Head cooling	If head cooling was needed during NICU admission	As provided	No Yes
	nh_cool	Head cooling		0 = no 1 = yes
	nr_hie	Hypoxic ischaemic encephalopathy	If HIE diagnosed - the worst grade	As provided	1 3
	nh_hie	Hypoxic ischaemic encephalopathy		0 = no 1 = yes
	nh_hiegrade	Worst grade of HIE		0 = none 1 = 1 2 = 2 3 = 3
	nr_intrahaem	Intraventricular haemorrhage	If intraventricular haemorrhage diagnosed	As provided	Yes
	nh_intrahaem	Intraventricular haemorrhage		0 = no 1 = yes
	nr_oxygtx	Oxygen required >28 days	Whether O2 therapy was required after 28 days of life	As provided	Yes
	nh_oxygtx	Oxygen required >28 days		0 = no 1 = yes
	nr_nec	Necrotising enterocolitis	Whether neonate suffered from necrotising enterocolitis	As provided	Yes
	nh_nec	Necrotising enterocolitis		0 = no 1 = yes
	nr_sepsis	Sepsis	Whether neonate suffered from sepsis	As provided	Yes
	nh_sepsis	Sepsis		0 = no 1 = yes
	nr_retin	Retinopathy of prematurity	Whether neonate suffered from retinopathy of prematurity	As provided	Yes
	nh_retin	Retinopathy of prematurity		0 = no 1 = yes
	nr_hypotherm	Hypothermia	Whether neonate suffered from hypothermia	As provided	Yes
	nh_hypotherm	Hypothermia		0 = no 1 = yes
	nr_hypoglyc	Hypoglycemia	Whether neonate suffered from hypoglycemia	As provided	Yes
	nh_hypoglyc	Hypoglycemia		0 = no 1 = yes
	nr_ngt	Nasogastric tube feeding	Whether the neonate required NGT	As provided	Yes
	nh_ngt	Nasogastric tube feeding		0 = no 1 = yes
	ac_nicuadmit_activ	Neonate was admitted to neonatal unit	Was the neonate admitted to neonatal ICU, HDU or SCBU?	0=no 1=yes
	nr_admitdate_activ	Date of admission to neonatal care		As provided	dd/mm/yyyy
	ah_admitdate_activ	Date of admission to neonatal care		dd/mm/yyyy
	ah_admittime_activ	Time of admission to neonatal care		hh:mm
	nr_dischdate_activ	Date of discharge from neonatal care		As provided	dd/mm/yyyy
	ah_dischdate_activ	Date of discharge from neonatal care		dd/mm/yyyy
	ah_dischtime_activ	Time of discharge from neonatal care		hh:mm
	nr_niculength_activ	NICU Length of stay	Length of stay during NICU admission (days)	As provided	Numerical
	ac_niculength_activ	NICU Length of stay	Length of stay during NICU admission (days) calculated from admission and discharge date/time	Continuous
	nr_niculevel_activ	Level of care	Level of care required in NICU	As provided	Highest level with recorded days from: 0 = BAPM2011_IC 1 = BAPM2011_HD 2 = BAPM2011_SC 3 = BAPM2011_NC
	ac_niculevel_activ	Level of care	Highest level of care required	0 = NICU 1 = HDU 2 = SCBU 3 = Transitional 4 = None
	nr_losnicu_activ	Length of stay in NICU			Numerical
	nr_loshdu_activ	Length of stay in neonatal HDU			Numerical
	nr_losscbu_activ	Length of stay in SCBU			Numerical
	nr_lostrans_activ	Length of stay in neonatal transitional care			Numerical
		Shoulder dystocia
		Brachial plexus injury

## Sheet: Ultrasound variables
	ULTRASOUND DATA
Mark with an "X" if required	Variable name	Title	Variable Explanation	Variable option	Example site - raw data
	Standard variables
	mc_studyid	Study ID	ID of the study participant
	mc_pregid	Pregnancy ID	ID of pregnancy/ies within study period	Numerical
	mc_babyid	Baby ID	ID of baby, if twins - 1 and 2	Numerical
		Ultrasound
	ur_examdate	Examination date		As provided	ddmmmyyyy
	uh_examdate	Examination date		dd/mm/yyyy
	ur_scannumber	Scan number in this pregnancy		Integer	Integer
	ur_fetusnumber	Fetus number		Integer	Integer
	uh_multiplepreg	Scan for multiple pregnancy		0 = singleton 1 = multiple
	ur_scantype	Type of scan (nuchal, other first trimester, anomaly, growth, doppler)		As provided	First trimester screening AFI and Umbilical Doppler Anomaly Scan Cervical Assessment Complete First Trimester Screening Completion of Anomaly Scan Confirm non viable Dating Scan Early Anomaly Scan Early Pregnancy Early anomaly scan FMU Referral First Trimester Screening Growth Scan Growth Scan, AFI & doppler Late Anomaly Scan Placental Site Presentation Scan Reassurance Scan Reassurance Scan - ea…
	uh_scantype	Type of scan (nuchal, other first trimester, anomaly, growth, doppler)		1 = early pregnancy 2 = nuchal 3 = anomaly 4 = specialist anomaly 5 = growth 6 = liquor/dopplers
	uh_sonographer	Sonographer or fetal medicine		1 = sonographer 2 = fetal medicine
	uh_hadgrowth	Any growth scan?		0 = no 1 = yes
	uh_lastgrowth	Label last growth scan		0 = early scan 1 = latest growth scan in the pregnancy
	ac_totalscans_preg	Total number of scans in pregnancy (not including early pregnancy scans)		Integer
	ac_sonoscans_preg	Number of scans in pregnancy conducted by sonographer		Integer
	ac_fmuscans_preg	Number of scans in pregnancy conducted by fetal medicine team		Integer
	ur_eddscan	Estimated due date of the pregnancy by scan		As provided	ddmmmyyyy
	uh_eddscan	Estimated due date of the pregnancy by scan		dd/mm/yyyy
	ur_ga	Gestational age as provided		As provided	Numerical in weeks and days (separate variables)
	uh_gaweeks	Gestational age in weeks (format weeks + days)		Integer (0-45)
	uh_gadays	Gestational age in days (format weeks + days)		Integer (0-6)
	uc_gatotaldays	Gestational age in total days (/280)	Calculated from EDD(scan) and date of scan	Integer (0-315)
	ur_crl	Crown rump length		Continuous
	ur_nt	Nuchal translucency	Nuchal translucency at the dating scan	Continuous
	ur_pappa	PAPP-A value		Continuous	Continuous
	ur_pappamom	PAPP-A MoM		Continuous	Continuous
	ur_hcg	B-hCG value		Continuous	Continuous
	ur_hcgmom	B-hCG MoM		Continuous	Continuous
	ur_presentation	Fetal presentation on scan		As provided	Breech Breech dorso-anterior Breech dorso-posterior Cephalic Cephalic dorso-anterior Cephalic dorso-posterior Oblique-breech Oblique - cephalic Transverse Unstable lie
	uh_presentation	Fetal presentation on scan		0 = Cephalic 1 = Breech 2 = Oblique 3 = Transverse
	ur_placenta	Position of placenta on scan		As provided	Anterior Anterior high Anterior low Fundal Lateral left low Lateral right low Left lateral Left lateral high Placenta previa major - anterior Placenta previa major - posterior Placenta previa major - central Posterior Posterior high Posterior low Right lateral Right lateral high
	ur_ac	Abdominal circumference		Continuous	Continuous
	ur_hc	Head circumference		Continuous	Continuous
	ur_bpd	Biparietal diameter		Continuous	Continuous
	ur_fl	Femur length		Continuous	Continuous
	ur_efw	Estimated fetal weight		Continuous	Continuous
	ur_efwmethod	Estimated fetal weight method		As provided	Combs (AC, FL, HC) Hadlock (BPD-HC-AC-FL) Hadlock (FL-AC) Hadlock (HC, AC, FL) Warsof (BPD-AC) Manual
	uc_efwpopcentile	EFW centile (pop)	Calculated centile	Continuous
	uc_popsga	Growth status by EFW pop centile		0 = AGA 1 = SGA 2 = LGA
	uc_efwcustcentile	EFW centile (cust)		Continuous
	uc_custsga	Growth status by EFW cust centile		0 = AGA 1 = SGA 2 = LGA
	ur_dp	Deepest pool		Continuous	Continuous
	uc_dpcentile	Deepest pool centile	Calculated centile	Continuous
	ur_afi	Amniotic fluid index		Continuous
	uc_aficentile	AFI centile	Calculated centile	Continuous
	ur_afcomment	Oligohydramnios / normal liquor / polyhydramnios		As provided	Anhydramnios Increased Normal Oligohydramnios Polyhydramnios Reduced
	uh_afcomment	Oligohydramnios / normal liquor / polyhydramnios		0 = Normal liquor (10th-90th centile) 1 = Anhydramnios (DP/AFI<1cm) 2 = Oligohydramnios (<10th centile but not anhydramnios) 3 = Polyhydramnios (>90th centile)
	ur_umbpi	Umb artery PI		Continuous	Continuous
	uc_umbpicent	Umbilical artery PI centile		Continuous
	uc_umbpihigh	High umbilical artery PI		0 = PI<=95th centile 1 = PI>95th centile
	ur_umbedf	Umb artery end diastolic flow		As provided	Absent Intermittently absent Intermittently reverse Negative Positive Reverse flow
	uh_umbedf	Umb artery end diastolic flow		0 = positive 1 = intermittently absent 2 = absent 3 = intermittently reversed 4 = reversed
	ur_dvpi	Ductus venosus PI		Continuous
	uc_dvpicent	Ductus venosus PI centile		Continuous
	uc_dvpihigh	Ductus venosus PI >95th centile		0 = DV<=95th centile 1 = DV>95th centile
	ur_dvawave	Ductus venosus a-wave		As provided	Absent Positive Reverse flow
	uh_dvawave	Ductus venosus a-wave		0 = positive 1 = absent 2 = reversed
	ur_mcapi	Middle cerebral artery PI		Continuous	Continuous
	uc_mcapicent	Middle cerebral arery PI centile		Continuous
	uc_mcapilow	Middle cerebral artery PI <5th centile		0 = MCA PI>=5th centile 1 = MCA PI<5th centile
	ur_mcapsv	Middle cerebral artery PSV		Continuous	Continuous
uc_mcapsv	uc_mcapsvcent	Middle cerebral artery PSV centile		Continuous
	uc_mcapsvhigh	Middle cerebral PSV high flow		0 = MCA PSV <95th centile 1 - MCA PSV >95th centile
	ur_fetalabnorm	Presence of any fetal abnormalities		As provided
	uh_fetalabnorm	Presence of any fetal abnormalities		0 = no 1 = yes

## Sheet: Activity variables
	ACTIVITY DATA
Mark with an "X" if required	Variable name	Title	Variable Explanation	Variable option	Example site - raw data
	Standard variables
	mc_studyid	Study ID	ID of the study participant
	mc_pregid	Pregnancy ID	ID of pregnancy/ies within study period	Numerical
	mc_babyid	Baby ID	ID of baby, if twins - 1 and 2	Numerical
		Activity
	ar_admitdate_activ	Date of admission to hospital		As provided	Inpatient Admissions_all_anonymised/Admission Date
	ah_admitdate_activ	Date of admission to hospital		dd/mm/yyyy
	ah_admittime_activ	Time of admission to hospital		hh:mm
	ar_dischargedate_activ	Date of discharge from hospital		As provided	Inpatient Admissions_all_anonymised/Discharge Date
	ah_dischargedate_activ	Date of discharge from hospital		dd/mm/yyyy
	ah_dischargetime_activ	Time of discharge from hospital		hh:mm
	ar_admittype_activ	Type of hospital admission		As provided	Ward Code & Name - Admitting ANW - Antenatal Ward OU - Obstetric unit AMU - Alongside midwifery unit PNW - Postnatal
	ah_admittype_activ	Type of hospital admission		0=antenatal admission 1=labour and birth 2=postnatal	0= ANW - Antenatal Ward 1= OU - Obstetric Unit- Hospital Birth Centre AMU - Alongside midwifery unit 2=PNW - Postnatal
	ac_admittype_activ	Type of pregnancy admission	Antenatal admission for this pregnancy - discharge date/time occurs between estimated date of conception (delivery date minus gestational age in weeks, plus two weeks) and 24 hours before the delivery date/time Antenatal/intrapartum admission - admission more than 24 hours before the date/time of delivery but discharge is after the date/time of birth Delivery episode is for any admission from 24 …	0=antenatal admission 1=Antenatal/intrapartum admission 2=delivery episode 3=postnatal admission
	ar_los_activ				N/A
	ac_los_activ	Length of stay for hospital admission	Calculate in hours from date/time of admission and discharge	Integer
	mh_deldate	Date of delivery	Delivery date (dd/mm/yyyy). Temporary variable brought into activity data for purpose of calculating other new variables and then deleted.	dd/mm/yyyy
	mh_deltime	Time of delivery	Time of delivery - if twins, two times (hh:mm). Temporary variable brought into activity data for purpose of calculating other new variables and then deleted.	hh:mm
	ac_antenatlos_activ	Length of stay during admission prior to intrapartum care (until 24 hours before delivery date/time)	Calculated from date of delivery - all hours admitted to hospital until 24 hours prior to delivery date/time	Continuous
	ac_postnatlos_activ	Length of stay during admission after intrapartum care (stay from 24h post delivery date/time until hospital discharge)	Calculated from date/time 24h after date/time of delivery, or date/time of admission if postnatal readmission (any time spent in hospital following the date/time of delivery of the baby) until date/time of discharge. Presented in hours.	Continuous
	ac_numantenatadmit_preg	Number of antenatal admissions during the pregnancy
	ac_totalanlos_preg	Total length of antenatal stay	The sum of all ac_antenatlos_activ for a given pregnancy	Continuous
	ar_ancdate_activ	Date of antenatal clinic		As provided	Antenatal Outpatients_all_anonymised/Appointment Date
	ah_ancdate_activ	Date of antenatal clinic		dd/mm/yyyy
	ac_ancnum_preg	Total number of antenatal appointments for the pregnancy	Total number of episodes where ah_ancdate_activ!=. For that study_pregnancyID	Integer
	ar_anchcp_activ	Antenatal clinic booked with which health care professional		As provided	Main Spec Code & Name 1000 - Midwifery 2000 - Obstetrics 3000 - Diabetic Medicine
	ah_anchcp_activ	Antenatal appointment with which type of HCP		0 = midwife 1 = obstetric	0= 1000 - Midwifery 1= 2000 - Obstetrics 3000 - Diabetic Medicine
	ac_ancmw_preg	Total number of antenatal appointments with midwife	Count of episodes for study/pregnancyID where ah_anchcp_activ=0	Integer
	ac_ancons_preg	Total number of antenatal appointments with consultant	As above but ah_anchcp_activ=1	Integer
	ar_triagedate_activ	Date of attendance to maternity triage		As provided	N/A
	ah_triagedate_activ	Date of attendance to maternity triage		dd/mm/yyyy
	ac_numtriage_preg	Number of attendances to maternity triage	Count of episodes for study/pregnancyID where ah_triagedate_activ!=.	Integer
	ar_maudate_activ	Date of attendance to maternal assessment unit		As provided	Day Assessment Unit data-all anonymised/Appointment Date
	ah_maudate_activ	Date of attendance to maternal assessment unit		dd/mm/yyyy
	ah_nummau_preg	Number of attendances to maternity assessment unit	Count of episodes for study/pregnancyIDwhere ah_maudate_activ!=.	Integer
